# Supplementary material for: Opioid Analgesic as a Positive Allosteric Modulator of Acid-Sensing Ion Channels
Source: MDPI journal article supplement (doi:10.3390/ijms25031413), 2024-01-24
Supplement: s1 [file s1]

## Supplementary Materials

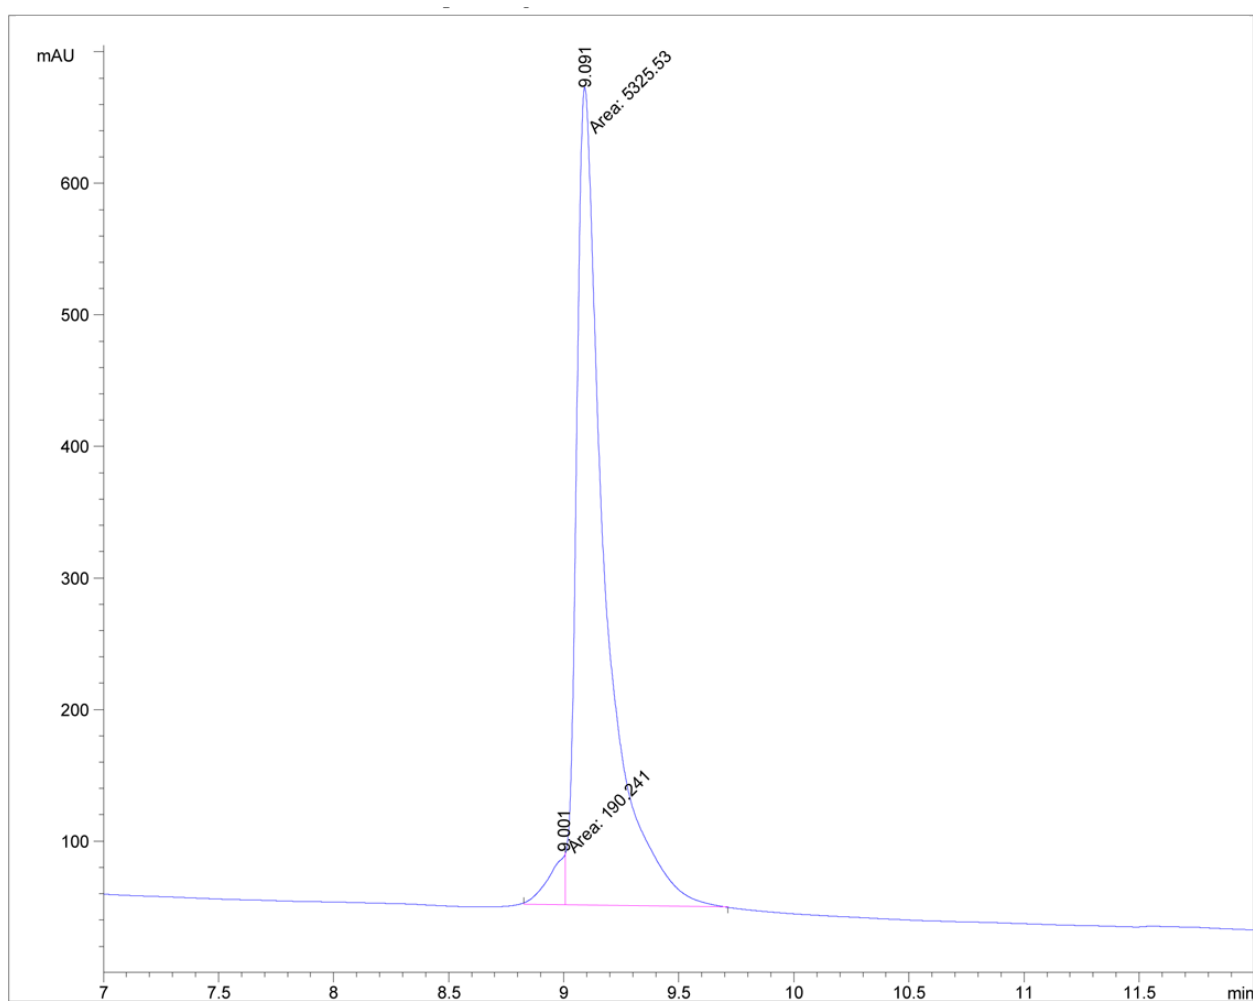

Figure S1. The purity of the tafalgin sample was analysed on Xbridge C18 column 130A (Waters, 4.6x250 mm).

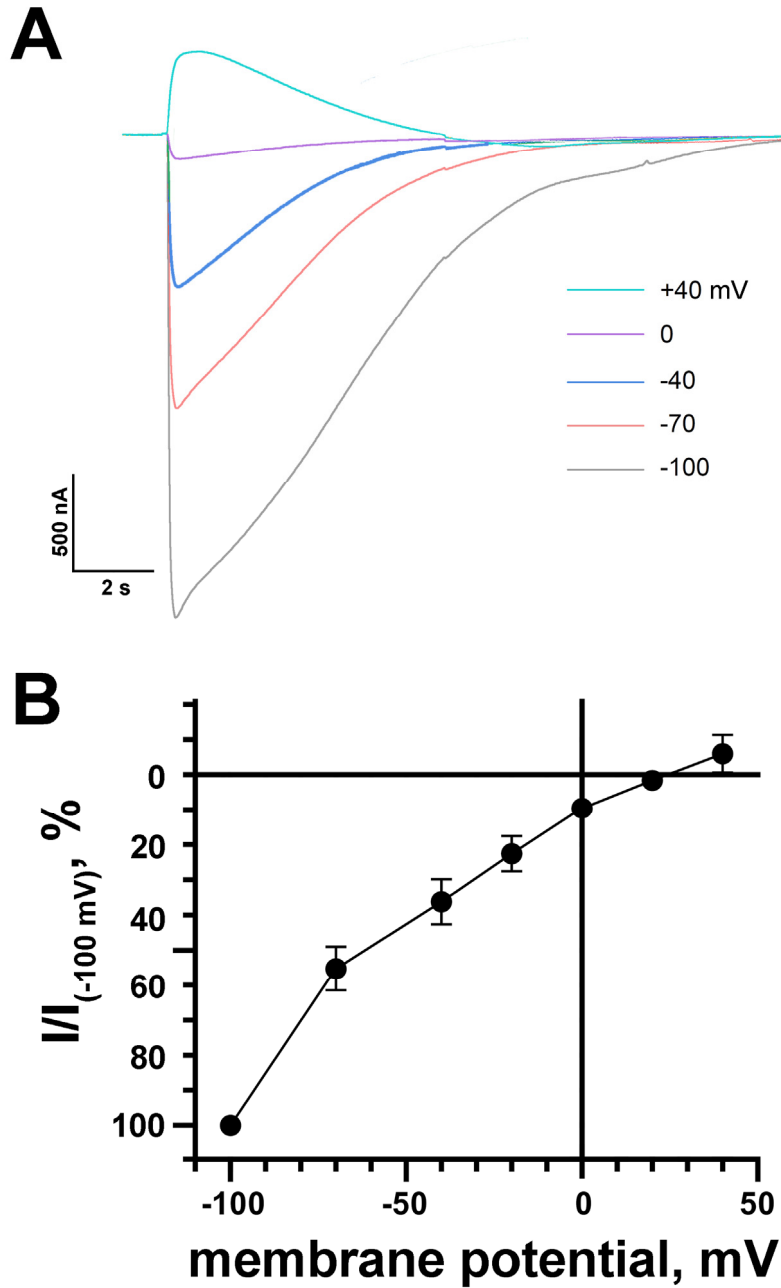

Figure S2. Current-voltage (I-V) relation of rat ASIC1a current. (A) Representative current traces at different holding potentials of ASIC1a heterologously expressed in *X. laevis* oocytes. (B) I-V plot of the currents recorded in the whole-cell configuration. For the I-V plot, currents elicited by pH 5.5 at different holding potentials were recorded. Current amplitudes were normalized to the amplitudes of the currents at  $V = -100$  mV and plotted against the holding potentials. Each dot represents mean  $\pm$  SEM ( $n = 5$ ).
